# Supplementary material for: Polystyrene nanoplastics target lysosomes interfering with lipid metabolism through the PPAR system and affecting macrophage functionalization
Source: Royal Society of Chemistry journal article supplement (doi:10.1039/d2en01077a), 2023-01-01
Supplement: d2en01077a2.pdf [file d2en01077a2.pdf]

## Supplementary Table 1

| Non-labelled Polystyrene nanoplastics |     | Ultrapure water | DMEM            |
|---------------------------------------|-----|-----------------|-----------------|
| Size (nm)                             | 0h  | 43.24 ± 0.7502  | 49.90 ± 0.7596  |
|                                       | 24h | 46.83 ± 1.393   | 65.31 ± 1.154   |
| Zeta potential (mV)                   | 0h  | -15.7 ± 1.232   | -14.0 ± 1.30    |
|                                       | 24h | -15.4 ± 0.932   | -18.0 ± 0.70    |
| PDI                                   | 0h  | 0.093 ± 0.017   | 0.095 ± 0.0145  |
|                                       | 24h | 0.048 ± 0.0224  | 0.195 ± 0.00427 |

  

| Fluorescent Polystyrene nanoplastics |     | Ultrapure water | DMEM           |
|--------------------------------------|-----|-----------------|----------------|
| Size (nm)                            | 0h  | 64.12 ± 0.66    | 78.55 ± 0.94   |
|                                      | 24h | 65.1 ± 0.6      | 71.3 ± 0.5     |
| Zeta potential (mV)                  | 0h  | -15.01 ± 0.954  | -20.52 ± 1.103 |
|                                      | 24h | -23.6           | -20.6          |
| PDI                                  | 0h  | 0.0299 ± 0.011  | 0.1432 ± 0.014 |
|                                      | 24h | 0.03            | 0.05           |

# Supplementary Figure 1

**a**

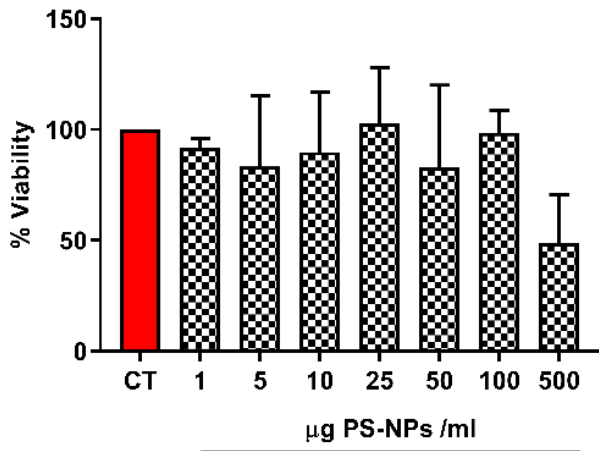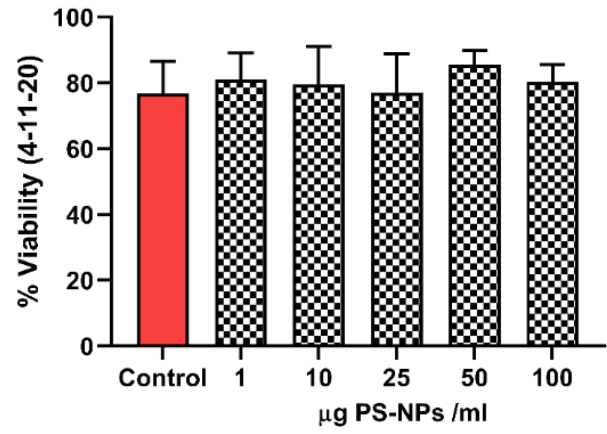

**b**

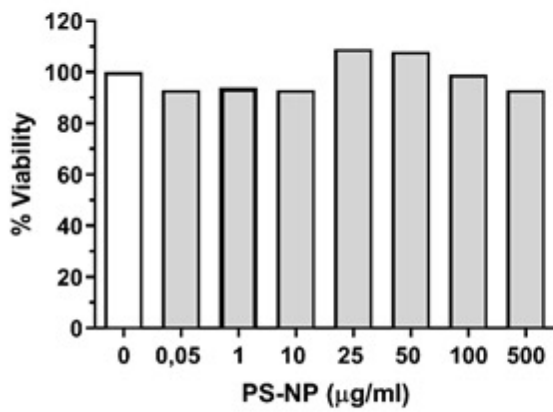

## Supplementary Table 2

| Gene                                                | Acronym            | Primer sequence (5' to 3')                              | Tm (°C)            | Size product | Acc. ID |
|-----------------------------------------------------|--------------------|---------------------------------------------------------|--------------------|--------------|---------|
| <i>Growth Arrest Specific 7</i>                     | <i>gas7</i>        | F: ATCATCACATCGCAGAACTACG<br>R: TCGTATCATCTCCACCCTCTC   | F: 63.9<br>R: 63.0 | 264          | XM_0369 |
| <i>β-actin</i>                                      | <i>β-actin</i>     | F: ATGGAAGATGAAATCGCC<br>R: TGCCAGATCTTCTCCATG          | F: 62.5<br>R: 59.9 | 224          | AJ438   |
| <i>Elongation factor 1 alpha</i>                    | <i>ef1α</i>        | F: CAAGGATATCCGTCGTGGCA<br>R: ACAGCGAAACGACCAAGAGG      | F: 68.1<br>R: 66.5 | 287          | NM_0011 |
| <i>Peroxisome proliferator-activated receptor α</i> | <i>ppar α</i>      | F: CTGGAGCTGGATGACAGTGA<br>R: AAGTTTTTGCAGCAGATTGG      | F: 64.5<br>R: 61.8 | 148          | AY494   |
| <i>Peroxisome proliferator-activated receptor β</i> | <i>ppar β</i>      | F: CTGGAGCTGGATGACAGTGA<br>R: GTCAGCCATCTTGTTGAGCA      | F: 64.3<br>R: 64.1 | 155          | NM_0011 |
| <i>Peroxisome proliferator-activated receptor γ</i> | <i>ppar γ</i>      | F: GCCAGTACTGTCGCTTTCAGA<br>R: TCCATAAACTCAGCCTGCAG     | F: 62.6<br>R: 63.0 | 72           | HM536   |
| <i>Interleukin 1β</i>                               | <i>il1β</i>        | F: GGAGGCAGCAGCTACCACAAA<br>R: CCGATTTGGAGCAGGACAGG     | F: 68.6<br>R: 69   | 92           | NM_0011 |
| <i>Interleukin 6</i>                                | <i>il6</i>         | F: TTTCAGAAGCCCGTGGAAGAGA<br>R: TCTTTGACCAGCCCTATCAGCA  | F: 69.1<br>R: 67.9 | 195          | DQ86    |
| <i>Interleukin 10</i>                               | <i>il10</i>        | F: CGACTTTAAATCTCCCATCGAC<br>R: GCATTGGACGATCTCTTTCTT   | F: 63.5<br>R: 62.1 | 27           | AB11    |
| <i>Interleukin 12</i>                               | <i>il12</i>        | F: ACGCACTTGACAGGAACAC<br>R: CCCCTTCAACACTTTACACA       | F: 66.4<br>R: 60.1 | 363          | HG917   |
| <i>Tumour necrosis factor α</i>                     | <i>tnfa</i>        | F: AGCATGGAAGACCGTCAACGAT<br>R: ACCCTCTAAATGGATGGCTGCTT | F: 68.9<br>R: 67.5 | 86           | AJ27    |
| <i>Matrix metalloproteinase 9</i>                   | <i>mmp9</i>        | F: TTCCAATTCAAGGGCAACTC<br>R: TCAGCCCCCACAGTTAAGAG      | F: 63.9<br>R: 64.1 | 96           | NM_0011 |
| <i>Cathepsin D</i>                                  | <i>cathepsin D</i> | F: GCCTGTCATCACATTCAACCTG<br>R: GCCACTCAGGCAGATGGTCTTA  | F: 66.7<br>R: 67.5 | 59           | U903    |
| <i>Cyclooxygenase 2</i>                             | <i>cox2</i>        | F: CACCAAGCAAATCGCTGGA                                  | F: 67.3            | 111          | AJ23    |

# Supplementary Table 3

| MACROPHAGE PHENOTYPES             |                                   |                                                               |                                   |
|-----------------------------------|-----------------------------------|---------------------------------------------------------------|-----------------------------------|
| M1                                | M2                                | References                                                    | PS-NPs macrophages                |
| + IL1b / IFN-γ                    | - IL1b / IFN-γ                    | (He et al., 2021; Yunna et al., 2020)                         | - IL1b / IFN-γ / CCL4 / CD209     |
| + IL2                             | - IL2                             | (Yunna et al., 2020)                                          | ? IL2 n.d.                        |
| - IL4                             | + IL4                             | (Castro et al., 2011; Yunna et al., 2020)                     | ? IL4 n.d.                        |
| + IL6                             | - IL6                             | (Yunna et al., 2020)                                          | - IL6                             |
| - IL10                            | + IL10                            | (Yunna et al., 2020)                                          | + IL10                            |
| + IL12                            | - IL12                            | (Yunna et al., 2020)                                          | - IL12                            |
| - IL13                            | - IL13                            | (Yunna et al., 2020)                                          | ? IL13 n.d.                       |
| - TGFβ                            | + TGFβ                            | (Castro et al., 2011)                                         | ? TGFβ n.d.                       |
| + COX2                            | - COX2                            | (Castro et al., 2011)                                         | - COX2                            |
| + ROS                             | - ROS                             | (He et al., 2021)                                             | - ROS                             |
| - Arginase 2                      | + Arginase 2                      | (Yunna et al., 2020)                                          | - Arginase 2                      |
| + CD80 / CD86 / CD16 / 32         | - CD80 / CD86 / CD16 / 32         | (Yunna et al., 2020)                                          | ? CD80 / CD86 / CD16 / 32 n.d.    |
| - CD36                            | + CD36                            | (Toobian et al., 2021)                                        | + CD36                            |
| - CD86 / CD206                    | + CD86 / CD206                    | (Yunna et al., 2020)                                          | ? CD86 / CD206 n.d.               |
| - CCL17 / CCL22                   | + CCL17 / CCL22                   | (Yunna et al., 2020)                                          | ? CCL17 / CCL22 n.d.              |
| + CCL25                           | - CCL25                           | (Xuan et al., 2015)                                           | + CCL25                           |
| - Akt1                            | + Akt1                            | (Yunna et al., 2020)                                          | - Akt1 (non significant)          |
| + Akt2                            | - Akt2                            | (Yunna et al., 2020)                                          | + Akt2 (non significant)          |
| + PPARα                           | - PPARα                           | (Toobian et al., 2021)                                        | - PPARα                           |
| - PPARγ                           | + PPARγ                           | (Toobian et al., 2021)                                        | - PPARγ                           |
| - PPARβ                           | + PPARβ                           | (Murray, 2017)                                                | + PPARβ                           |
| - Perilipin 2                     | + Perilipin 2                     | (Caslin et al., 2020)                                         | + Perilipin 2                     |
| - Fatty acid oxidation            | + Fatty acid oxidation            | (Yunna et al., 2020)                                          | + Fatty acid oxidation            |
| + Aerobic glycolysis              | - Aerobic glycolysis              | (Yunna et al., 2020)                                          | - Aerobic glycolysis              |
| + Cathepsin B, D / procathepsin L | - Cathepsin B, D / procathepsin L | (Fang et al., 2020; Hausmann et al., 2004; Wolf et al., 2003) | + Cathepsin B, D / procathepsin L |
| - MMP9                            | + MMP9                            | (Li et al., 2020; Nagase et al., 2006; Odaka et al., 2005)    | + MMP9                            |
